# Supplementary material for: Bismesitylmagnesium: a thermally stable and non-nucleophilic carbon-centred base reagent for the efficient preparation of silyl enol ethers
Source: Royal Society of Chemistry journal article supplement (doi:10.1039/b711407a), 2007-01-01
Supplement: b711407a.pdf [file b711407a.pdf]

## **‘Bismesitylmagnesium: a thermally stable and non-nucleophilic carbon-centred base reagent for the efficient preparation of silyl enol ethers’**

William J. Kerr,<sup>\*a</sup> Allan J. B Watson<sup>a</sup> and Douglas Hayes<sup>b</sup>

<sup>a</sup>Department of Pure and Applied Chemistry, WESTChem, University of Strathclyde, 295 Cathedral Street, Glasgow, G1 1XL, Scotland, UK

<sup>b</sup>GlaxoSmithKline, Medicines Research Centre, Gunnels Wood Road, Stevenage, Hertfordshire, SG1 2NY, UK.

### **Supporting Information**

#### **1. General**

##### **1.1. Purification of Reagents**

THF and 1,4-dioxane were dried by heating to reflux over sodium wire using benzophenone ketyl as indicator, and then distilled under N<sub>2</sub>. Diethyl ether and light petroleum were used as purchased from suppliers without further purification. Light petroleum refers to the fraction of b.p. 30-40°C.

2-Mesitylmagnesium bromide,<sup>1</sup> obtained as a 1 M solution in THF, *n*-butyllithium, obtained as a 2.5 M solution in hexanes, and *tert*-butyllithium, obtained as a 1.7 M solution in pentane, were standardised using salicylaldehyde phenylhydrazone as indicator.<sup>2</sup>

*Diisopropylamine* was dried by heating to reflux over calcium hydride and distilling under nitrogen.

Cyclohexanone **1a**, cyclopentanone **1b**, cycloheptanone **1c**, 2-methylcyclohexanone **1d**, 2,6-dimethylcyclohexanone **1e**, 4-methylcyclohexanone **1f**, 4-*n*-propylcyclohexanone **1g**,  $\alpha$ -tetralone **1j**, 4-chlorobutyrophenone **1k**, and propiophenone **1l** were dried by heating to reflux over calcium chloride and distilled either under reduced pressure or under nitrogen and stored over 4 Å molecular sieves.

4-*t*-Butylcyclohexanone **1h** and 4-phenylcyclohexanone **1i** were recrystallised twice from dry hexane at 4°C and stored under N<sub>2</sub>.

Chlorotrimethylsilane was distilled under N<sub>2</sub> and stored over 4 Å molecular sieves.

## 1.2. Purification and Analysis of Products

Thin layer chromatography was carried out using Camlab silica plates coated with indicator UV<sub>254</sub>. These were analysed using a Mineralight UVGL-25 lamp or developed using vanillin. Flash column chromatography was carried out using Prolabo silica gel (230-400 mesh).

Gas chromatography was carried out using a Hewlett Packard 5890 Series 2 Gas Chromatograph fitted with a Varian WCOT Fused Silica Column containing a CP-SIL 19CB coating and using H<sub>2</sub> as carrier gas.

IR spectra were obtained on a Perkin Elmer Spectrum One machine.

<sup>1</sup>H and <sup>13</sup>C spectra were recorded on a Bruker DPX 400 spectrometer at 400 MHz and 100 MHz, respectively. Chemical shifts are reported in ppm. Coupling constants are reported in Hz and refer to <sup>3</sup>J<sub>H-H</sub> interactions unless otherwise specified.

High resolution mass spectra was obtained using a JEOL JMS-700 high resolution mass spectrometer. The ionization method used was Electron Impact (EI) with PFK perfluorokerosene (PFK) as the reference compound.

## 2. Experimental Procedures

All reactions were air sensitive and, as such, were carried out using flame dried Schlenk apparatus. Purging refers to an evacuation/nitrogen refilling procedure carried out 3 times.

### 2.1 Preparation of Bismesitylmagnesium, Mes<sub>2</sub>Mg<sup>3,4</sup>

To a solution of MesMgBr (1 M in THF, 100 mmol, 100 mL) under N<sub>2</sub> at room temperature was added 1,4-dioxane (105 mmol, 9.25 g, 8.95 mL) steadily over 5 minutes. The mixture was stirred vigorously for 3 hours before discontinuation of the stirring. The mixture (now a yellow solution with a fine white precipitate) was then left to settle for 72 h. After this time, the precipitate had settled to a thick white layer at the bottom of the Schlenk tube allowing removal of the yellow Mes<sub>2</sub>Mg solution *via* cannula to a

previously flame-dried and purged pear-shaped flask. Care was taken to avoid withdrawing any of the precipitate. The Mes<sub>2</sub>Mg solution was standardised using salicaldehyde phenylhydrazone as indicator before use.<sup>2</sup> The molarity of the Mes<sub>2</sub>Mg solution was typically 0.5 M (100% conversion of MesMgBr to Mes<sub>2</sub>Mg, yield typically ~90 mL, ~90%).

## 2.2 Deprotonation of Cyclohexanone (1a) Using Mes<sub>2</sub>Mg with an Amine Additive

A flame-dried Schlenk tube was charged with Mes<sub>2</sub>Mg (0.5 M solution in THF, 1.1 mmol, 2.2 mL), THF (7.8 mL) and diisopropylamine (0.2 mmol, 20 mg, 28 µl). The mixture was stirred for 30 minutes at room temperature before cooling to 0°C. TMSCl (4 mmol, 435 mg, 0.5 mL) was added and the mixture was stirred for 5 minutes before addition of cyclohexanone (1 mmol, 98 mg, 0.1 mL) as a solution in THF (2 mL) over 1 h *via* syringe pump. The reaction mixture was stirred at 0°C under N<sub>2</sub> for 16 h before quenching with sat. NaHCO<sub>3</sub> aq. solution (10 mL). The mixture was allowed to warm to room temperature before extracting with Et<sub>2</sub>O ((1 x 40 mL) + (2 x 25 mL)). The combined organic extracts were dried (Na<sub>2</sub>SO<sub>4</sub>) and a representative sample was analysed by G.C. to obtain the ketone to silyl enol ether conversion. The solution was then filtered and concentrated *in vacuo* to afford a residue which was purified by column chromatography eluting with 1% Et<sub>2</sub>O/petrol to afford 1-trimethylsilyloxycyclohexene **2a** as a colourless oil.

## 2.3 Deprotonation of Cyclohexanone (1a) Using Mes<sub>2</sub>Mg without an Amine Additive

A flame-dried Schlenk tube was charged with Mes<sub>2</sub>Mg (0.5 M solution in THF, 1.1 mmol, 2.2 mL) and THF (7.8 mL). The mixture was stirred for 30 minutes at room temperature before cooling to 0°C. TMSCl (4 mmol, 435 mg, 0.5 mL) was added and the mixture was stirred for 5 minutes before addition of cyclohexanone (1 mmol, 98 mg, 0.1 mL) as a solution in THF (2 mL) over 1 h *via* syringe pump. The reaction mixture was stirred at 0°C under N<sub>2</sub> for 16 h before quenching with sat. NaHCO<sub>3</sub> aq. solution (10 mL). The mixture was allowed to warm to room temperature before extracting with Et<sub>2</sub>O ((1 x 40 mL) + (2 x 25 mL)). The combined organic extracts were dried (Na<sub>2</sub>SO<sub>4</sub>) and a representative sample was analysed by G.C. to obtain the ketone to silyl enol ether conversion. The solution was then filtered and concentrated *in vacuo* to afford a residue which was purified by column chromatography eluting with 1% Et<sub>2</sub>O/petrol to afford 1-trimethylsilyloxycyclohexene **2a** as a colourless oil.

## 2.4 Deprotonation of Ketones Using Optimised Mes<sub>2</sub>Mg Conditions

A Schlenk tube was charged with LiCl (2 mmol, 85 mg) and flame-dried under vacuum. The tube was purged three times with N<sub>2</sub> before cooling to room temperature and charging with Mes<sub>2</sub>Mg (0.5 M solution in THF, 0.5 mmol, 1 mL) and THF (9 mL). The mixture was stirred for 15 minutes at room temperature before cooling to 0°C. TMSCl (1 mmol, 108.64 mg, 0.13 mL) was added and the mixture was stirred for 5 minutes before addition of the ketone (1 mmol) as a solution in THF (2 mL) over 1 h *via* syringe pump. The reaction mixture was stirred at 0°C under N<sub>2</sub> for 8 h before quenching with sat. NaHCO<sub>3</sub> aq. solution (10 mL). The mixture was allowed to warm to room temperature before extracting with Et<sub>2</sub>O ((1 x 40 mL) + (2 x 25 mL)). The combined organic extracts were dried (Na<sub>2</sub>SO<sub>4</sub>) and a representative sample was analysed by G.C. to obtain the ketone to silyl enol ether conversion. The solution was then filtered and concentrated *in vacuo* to afford a residue which was purified by column chromatography eluting with 1% Et<sub>2</sub>O/petrol to afford the silyl enol ether product.

## 3. Product Data

IR and <sup>1</sup>H NMR data for known compounds **2a-2k** followed by IR, <sup>1</sup>H NMR, <sup>13</sup>C NMR, and HRMS data for novel compound **2l** are provided.

**2a:** 1-Trimethylsilyloxycyclohexene<sup>5,6,7a,8</sup>

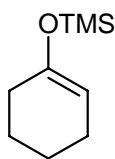

$\nu_{\max}$  (DCM): 1668 cm<sup>-1</sup>.

$\delta_{\text{H}}$  (400 MHz, CDCl<sub>3</sub>): 0.18 (s, 9H, Si(CH<sub>3</sub>)<sub>3</sub>), 1.48-1.54 (m, 2H, CH<sub>2</sub>), 1.63-1.69 (m, 2H, CH<sub>2</sub>), 1.97-2.03 (m, 4H, 2xCH<sub>2</sub>), 4.86-4.88 (m, 1H, CH).

**2b:** 1-Trimethylsiloxycyclopentene<sup>5,6,7b,9</sup>

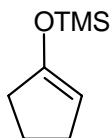

$\nu_{\max}$  (DCM): 1645  $\text{cm}^{-1}$ .

$\delta_{\text{H}}$  (400 MHz,  $\text{CDCl}_3$ ): 0.20 (s, 9H,  $\text{Si}(\text{CH}_3)_3$ ), 1.82-1.90 (m, 2H,  $\text{CH}_2$ ), 2.24-2.29 (m, 4H,  $2 \times \text{CH}_2$ ), 4.62-4.63 (m, 1H,  $\text{CH}$ ).

**2c:** 1-Trimethylsilyloxycycloheptene<sup>10</sup>

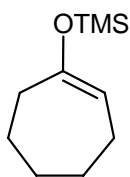

$\nu_{\max}$  (DCM): 1660  $\text{cm}^{-1}$ .

$\delta_{\text{H}}$  (400 MHz,  $\text{CDCl}_3$ ): 0.18 (s, 9H,  $\text{Si}(\text{CH}_3)_3$ ), 1.50-1.59 (m, 4H,  $2 \times \text{CH}_2$ ), 1.66-1.70 (m, 2H,  $\text{CH}_2$ ), 1.97-2.01 (m, 2H,  $\text{CH}_2$ ), 2.22-2.24 (m, 2H,  $\text{CH}_2$ ), 4.86-4.88 (m, 1H,  $\text{CH}$ ).

**2d:** 6-Methyl-1-trimethylsilyloxy-1-cyclohexene<sup>5,6,8</sup>

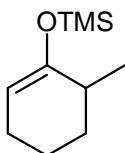

$\nu_{\max}$  (DCM): 1660  $\text{cm}^{-1}$ .

$\delta_{\text{H}}$  (400 MHz,  $\text{CDCl}_3$ ): 0.19 (s, 9H,  $\text{Si}(\text{CH}_3)_3$ ), 1.04 (d, 3H,  $\text{CH}_3$ ,  $J=7.0$  Hz), 1.36-1.41 (m, 1H,  $\text{CH}$ ), 1.45-1.49 (m, 1H,  $\text{CH}$ ), 1.57-1.59 (m, 1H,  $\text{CH}$ ), 1.78-1.82 (m, 1H,  $\text{CH}$ ), 1.98-2.02 (m, 2H,  $\text{CH}_2$ ), 2.14-2.15 (m, 1H,  $\text{CH}$ ), 4.81 (td, 1H,  $\text{CH}$ ,  $J=3.95, 1.2$  Hz).

**2e:** 2,6-Dimethyl-1-trimethylsilyloxy-1-cyclohexene<sup>11-16</sup>

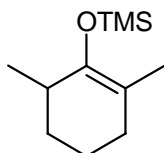

$\nu_{\max}$  (DCM): 1678  $\text{cm}^{-1}$ .

$\delta_{\text{H}}$  (400 MHz,  $\text{CDCl}_3$ ): 0.19 (s, 9H,  $\text{Si}(\text{CH}_3)_3$ ), 1.04 (d, 3H,  $\text{CH}_3$ ,  $J=6.9$  Hz), 1.35-1.41 (m, 1H, CH), 1.43-1.49 (m, 1H, CH), 1.56 (s, 3H,  $\text{CH}_3$ ), 1.58-1.65 (m, 1H, CH), 1.75-1.82 (m, 1H, CH), 1.95 (t, 2H, CH,  $J=6.2$ ), 2.12-2.14 (m, 1H, CH).

**2f:** 4-Methyl-1-trimethylsilyloxy-1-cyclohexene<sup>16-18</sup>

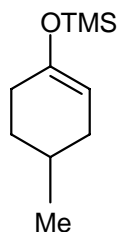

$\nu_{\max}$  (DCM): 1669  $\text{cm}^{-1}$ .

$\delta_{\text{H}}$  (400 MHz,  $\text{CDCl}_3$ ): 0.18 (s, 9H,  $\text{Si}(\text{CH}_3)_3$ ), 0.95 (d, 3H,  $\text{CH}_3$ ,  $J=6.3$  Hz), 1.29-1.34 (m, 1H, CH), 1.62-1.73 (m, 3H,  $\text{CH}+\text{CH}_2$ ), 1.93-2.00 (m, 1H, CH), 2.05-2.09 (m, 2H,  $\text{CH}_2$ ), 4.82-4.83 (m, 1H, CH).

**2g:** 4-*n*-Propyl-1-trimethylsilyloxy-1-cyclohexene<sup>16</sup>

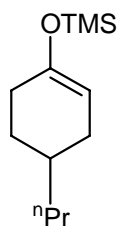

$\nu_{\max}$  (DCM): 1670  $\text{cm}^{-1}$ .

$\delta_{\text{H}}$  (400 MHz,  $\text{CDCl}_3$ ): 0.18 (s, 9H,  $\text{Si}(\text{CH}_3)_3$ ), 0.90 (t, 3H,  $\text{CH}_3$ ,  $J=7.2$  Hz), 1.21-1.37 (m, 5H,  $\text{CH}+2\times\text{CH}_2$ ), 1.44-1.49 (m, 1H, CH), 1.63-1.69 (m, 1H, CH), 1.72-1.78 (m, 1H, CH), 1.93-2.00 (m, 1H, CH), 2.05-2.12 (m, 2H,  $\text{CH}_2$ ), 4.82-4.84 (m, 1H, CH).

**2h:** 4-*t*-Butyl-1-trimethylsilyloxy-1-cyclohexene<sup>11,16,18</sup>

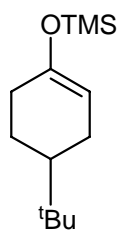

$\nu_{\max}$  (DCM): 1672  $\text{cm}^{-1}$ .

$\delta_{\text{H}}$  (400 MHz,  $\text{CDCl}_3$ ): 0.19 (s, 9H,  $\text{Si}(\text{CH}_3)_3$ ), 0.90 (s, 9H,  $3\times\text{CH}_3$ ), 1.21-1.29 (m, 2H,  $\text{CH}_2$ ), 1.78-1.85 (m, 2H,  $\text{CH}_2$ ), 1.98-2.09 (m, 3H,  $\text{CH}+\text{CH}_2$ ), 4.84-4.86 (m, 1H, CH).

**2i:** 4-Phenyl-1-trimethylsilyloxy-1-cyclohexene<sup>17,18</sup>

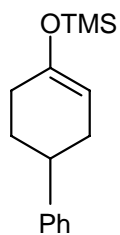

$\nu_{\max}$  (DCM): 1669  $\text{cm}^{-1}$ .

$\delta_{\text{H}}$  (400 MHz,  $\text{CDCl}_3$ ): 0.24 (s, 9H,  $\text{Si}(\text{CH}_3)_3$ ), 1.86-1.93 (m, 1H, CH), 1.96-1.99 (m, 1H, CH), 2.06-2.11 (m, 1H, CH), 2.19-2.34 (m, 3H, CH+CH<sub>2</sub>), 2.76-2.78 (m, 1H, CH), 4.97-4.98 (m, 1H, CH), 7.19-7.34 (m, 5H, C<sub>6</sub>H<sub>5</sub>).

**2j:** (3,4-Dihydro-1-naphthyloxy)trimethylsilane<sup>7c,10</sup>

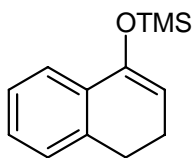

$\nu_{\max}$  (DCM): 1638  $\text{cm}^{-1}$ .

$\delta_{\text{H}}$  (400 MHz,  $\text{CDCl}_3$ ): 0.38 (s, 9H,  $\text{Si}(\text{CH}_3)_3$ ), 2.42-2.47 (m, 2H, CH<sub>2</sub>), 2.89 (t, 2H, CH<sub>2</sub>, J=7.8 Hz), 5.32 (t, 1H, CH, J=4.6 Hz), 7.21-7.36 (m, 3H, 3xArCH), 7.54 (d, 1H, ArCH, J=7.4).



**2k**: Z-4-Chloro-1-phenyl-1-trimethylsilyloxybut-1-ene

Single isomer, tentatively assigned as *Z* on comparison to the spectrum for **2l** (below) and from comparison to references 5, 9, 19, and 20.

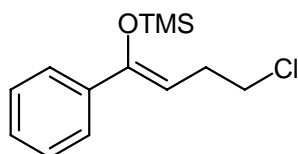

$\nu_{\max}$  (DCM): 1649  $\text{cm}^{-1}$ .

$\delta_{\text{H}}$  (400 MHz,  $\text{CDCl}_3$ ): 0.15 (s, 9H,  $\text{Si}(\text{CH}_3)_3$ ), 2.68 (q, 2H,  $\text{CH}_2$ ,  $J=7.1$  Hz), 3.59 (t, 2H,  $\text{CH}_2$ ,  $J=7.15$  Hz), 5.27 (t, 1H,  $\text{CH}$ ,  $J=7.1$  Hz), 7.26-7.34 (m, 3H, 3xArCH), 7.47 (dd, 2H, 2xArH,  $J=6.8, 1.5$  Hz).

$\delta_{\text{C}}$  (100 MHz,  $\text{CDCl}_3$ ): 0.8, 29.9, 44.4, 106.6, 125.8, 128.1, 128.3, 138.9, 151.6.

HRMS:  $m/z$  calculated for  $\text{C}_{13}\text{H}_{19}\text{ClOSi}$ :  $^{35}\text{Cl}$  254.0894  $^{37}\text{Cl}$  256.0864

Found:  $^{35}\text{Cl}$  254.0890  $^{37}\text{Cl}$  256.0839

**2l**: 1-Phenyl-1-silyloxyprop-1-ene<sup>5,9,19,20</sup>

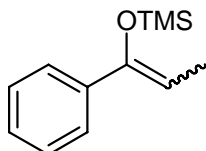

$\nu_{\max}$  (DCM): 1686, 1652  $\text{cm}^{-1}$ .

$\delta_{\text{H}}$  (400 MHz,  $\text{CDCl}_3$ ): *Z*-isomer: 0.17 (s, 9H,  $\text{Si}(\text{CH}_3)_3$ ), 1.76 (d, 3H,  $\text{CH}_3$ ,  $J=6.9$  Hz), 5.35 (q, 1H,  $\text{CH}$ ,  $J=6.9$  Hz), 7.23-7.49 (m, 5H, 5xArCH); *E*-isomer: 0.15 (s, 9H,  $\text{Si}(\text{CH}_3)_3$ ), 1.73 (d, 3H,  $\text{CH}_3$ ,  $J=7.3$  Hz), 5.13 (q, 1H,  $\text{CH}$ ,  $J=7.3$  Hz), 7.23-7.49 (m, 5H, 5xArCH).

#### 4. References

- 1) Commercially available from the Aldrich Chemical Co., CAS# [2633-66-1], catalogue no. 227234.
- 2) B. E. Love and E. G. Jones, *J. Org. Chem.*, 1999, **64**, 3755.
- 3) B. J. Wakefield, in *Organomagnesium Methods in Organic Synthesis*, Academic Press, London, 1995.
- 4) For additional preparations of  $\text{Mes}_2\text{Mg}$ , including crystal structures, see: a) W. Seidel and I. Bürger, *Z. Anorg. Allg. Chem.*, 1978, **447**, 195; b) K. M. Waggoner and P. P. Power, *Organometallics*, 1992, **11**, 3209; c) D. M. Knotter, D. M. Grove, W. J. J. Smeets, A. L. Spek and G. van Koten, *J. Am. Chem. Soc.*, 1992, **114**, 3400.
- 5) D. Bonafoux, M. Bordeau, C. Biran, P. Cazeau and J. Dunogues, *J. Org. Chem.*, 1996, **61**, 5532.
- 6) H. O. House, L. J. Czuba, M. Gall and H. D. Olmstead, *J. Org. Chem.*, 1969, **34**, 2324.
- 7) a) Commercially available from Aldrich Chemical Co., CAS# [6651-36-1], catalogue no. 144819; b) Commercially available from Aldrich Chemical Co., 2006 CAS# [19980-43-9], catalogue no. 283126; c) Commercially available from Aldrich Chemical Co., CAS# [38858-72-9], catalogue no. 540390.
- 8) I. Kopka and M. W. Rathke, *J. Org. Chem.*, 1981, **46**, 3771.
- 9) C. H. Heathcock, S. K. Davidsen, K. T. Hug and L. A. Flippin, *J. Org. Chem.*, 1986, **51**, 3027.
- 10) R. Rathore and J. K. Kochi, *J. Org. Chem.*, 1996, **61**, 627.
- 11) C. M. Cain, R. P. C. Cousins, G. Coumbarides and N. S. Simpkins, *Tetrahedron*, 1990, **46**, 523.
- 12) H. Kim, R. Shirai, H. Kawasaki, M. Nakajima and K. Koga, *Heterocycles*, 1990, **30**, 307.
- 13) N. S. Simpkins, *J. Chem. Soc., Chem. Commun.*, 1986, 88.
- 14) P. Dampawanand and W. W. Zajac, Jr., *J. Org. Chem.*, 1982, **47**, 1176.
- 15) G. M. Rubottom and H. D. Juve, Jr., *J. Org. Chem.*, 1983, **48**, 422.
- 16) K. W. Henderson, W. J. Kerr and J. H. Moir, *Tetrahedron*, 2002, **58**, 4573.
- 17) C.-D. Graf, C. Malan and P. Knochel, *Angew. Chem. Int. Ed.*, 1998, **37**, 3014.
- 18) C.-D. Graf, C. Malan, K. Harms and P. Knochel, *J. Org. Chem.*, 1999, **64**, 5581.
- 19) C. H. Heathcock; C. T. Buse, W. A. Kleschick, M. C. Pirrung, J. E. Sohn and J. Lampe, *J. Org. Chem.*, 1980, **45**, 1066.
- 20) F. A. Davis, A. C. Sheppard, B.-C. Chen and M. S. Haque, *J. Am. Chem. Soc.*, 1990, **112**, 6679.
